# Supplementary material for: Transcriptome sequencing of neurologic diseases associated genes in HHV-6A infected human astrocyte
Source: PubMed Central journal article supplement (PMC5217001; doi:10.18632/oncotarget.10127), 2016-06-17
Supplement: oncotarget-07-48070-s001.pdf [file oncotarget-07-48070-s001.pdf]

# Transcriptome sequencing of neurologic diseases associated genes in HHV-6A infected human astrocyte

## SUPPLEMENTARY FIGURES AND TABLES

### Disease analysis

| Sublist                  | Category                       | Term                                                                      | RT | Genes | Count | %   | P-Value | Benjamin |
|--------------------------|--------------------------------|---------------------------------------------------------------------------|----|-------|-------|-----|---------|----------|
| <input type="checkbox"/> | GENETIC_ASSOCIATION_DB_DISEASE | <a href="#">diabetes, type 1</a>                                          | RT |       | 9     | 1.8 | 3.5E-4  | 1.0E-1   |
| <input type="checkbox"/> | GENETIC_ASSOCIATION_DB_DISEASE | <a href="#">hepatitis B</a>                                               | RT |       | 5     | 1.0 | 6.5E-4  | 9.6E-2   |
| <input type="checkbox"/> | GENETIC_ASSOCIATION_DB_DISEASE | <a href="#">bone marrow transplantation</a>                               | RT |       | 4     | 0.8 | 1.2E-3  | 1.2E-1   |
| <input type="checkbox"/> | GENETIC_ASSOCIATION_DB_DISEASE | <a href="#">hepatitis C, chronic</a>                                      | RT |       | 4     | 0.8 | 6.2E-3  | 3.8E-1   |
| <input type="checkbox"/> | GENETIC_ASSOCIATION_DB_DISEASE | <a href="#">Graves disease</a>                                            | RT |       | 3     | 0.6 | 9.8E-3  | 4.6E-1   |
| <input type="checkbox"/> | GENETIC_ASSOCIATION_DB_DISEASE | <a href="#">cholangitis, sclerosing</a>                                   | RT |       | 3     | 0.6 | 1.5E-2  | 5.5E-1   |
| <input type="checkbox"/> | GENETIC_ASSOCIATION_DB_DISEASE | <a href="#">multiple sclerosis</a>                                        | RT |       | 6     | 1.2 | 1.7E-2  | 5.4E-1   |
| <input type="checkbox"/> | GENETIC_ASSOCIATION_DB_DISEASE | <a href="#">tuberculosis</a>                                              | RT |       | 4     | 0.8 | 1.8E-2  | 5.1E-1   |
| <input type="checkbox"/> | GENETIC_ASSOCIATION_DB_DISEASE | <a href="#">psoriasis</a>                                                 | RT |       | 4     | 0.8 | 2.5E-2  | 5.9E-1   |
| <input type="checkbox"/> | GENETIC_ASSOCIATION_DB_DISEASE | <a href="#">lung cancer; Lambert-Eaton myasthenic syndrome</a>            | RT |       | 2     | 0.4 | 2.8E-2  | 6.0E-1   |
| <input type="checkbox"/> | GENETIC_ASSOCIATION_DB_DISEASE | <a href="#">ankylosing spondylitis</a>                                    | RT |       | 3     | 0.6 | 3.3E-2  | 6.1E-1   |
| <input type="checkbox"/> | GENETIC_ASSOCIATION_DB_DISEASE | <a href="#">multiple sclerosis; optic neuritis</a>                        | RT |       | 2     | 0.4 | 4.7E-2  | 7.2E-1   |
| <input type="checkbox"/> | GENETIC_ASSOCIATION_DB_DISEASE | <a href="#">nasopharyngeal cancer</a>                                     | RT |       | 3     | 0.6 | 4.8E-2  | 6.9E-1   |
| <input type="checkbox"/> | GENETIC_ASSOCIATION_DB_DISEASE | <a href="#">rheumatoid arthritis</a>                                      | RT |       | 5     | 1.0 | 5.1E-2  | 6.9E-1   |
| <input type="checkbox"/> | GENETIC_ASSOCIATION_DB_DISEASE | <a href="#">Plasmodium falciparum infection</a>                           | RT |       | 2     | 0.4 | 5.6E-2  | 7.0E-1   |
| <input type="checkbox"/> | GENETIC_ASSOCIATION_DB_DISEASE | <a href="#">IgA, IgD, IgG, IgM</a>                                        | RT |       | 2     | 0.4 | 5.6E-2  | 7.0E-1   |
| <input type="checkbox"/> | GENETIC_ASSOCIATION_DB_DISEASE | <a href="#">HIV; cytomegalovirus retinitis</a>                            | RT |       | 2     | 0.4 | 5.6E-2  | 7.0E-1   |
| <input type="checkbox"/> | GENETIC_ASSOCIATION_DB_DISEASE | <a href="#">cytokine resposne</a>                                         | RT |       | 2     | 0.4 | 5.6E-2  | 7.0E-1   |
| <input type="checkbox"/> | GENETIC_ASSOCIATION_DB_DISEASE | <a href="#">diabetes, latent autoimmune</a>                               | RT |       | 2     | 0.4 | 5.6E-2  | 7.0E-1   |
| <input type="checkbox"/> | GENETIC_ASSOCIATION_DB_DISEASE | <a href="#">graft-versus-host disease</a>                                 | RT |       | 3     | 0.6 | 7.1E-2  | 7.6E-1   |
| <input type="checkbox"/> | GENETIC_ASSOCIATION_DB_DISEASE | <a href="#">measles</a>                                                   | RT |       | 2     | 0.4 | 8.3E-2  | 8.0E-1   |
| <input type="checkbox"/> | GENETIC_ASSOCIATION_DB_DISEASE | <a href="#">infection, post allograft</a>                                 | RT |       | 2     | 0.4 | 8.3E-2  | 8.0E-1   |
| <input type="checkbox"/> | GENETIC_ASSOCIATION_DB_DISEASE | <a href="#">celiac disease; Wegener's granulomatosis; cervical cancer</a> | RT |       | 2     | 0.4 | 8.3E-2  | 8.0E-1   |
| <input type="checkbox"/> | GENETIC_ASSOCIATION_DB_DISEASE | <a href="#">multiple system atrophy</a>                                   | RT |       | 2     | 0.4 | 8.3E-2  | 8.0E-1   |
| <input type="checkbox"/> | GENETIC_ASSOCIATION_DB_DISEASE | <a href="#">vitiligo</a>                                                  | RT |       | 2     | 0.4 | 8.3E-2  | 8.0E-1   |
| <input type="checkbox"/> | GENETIC_ASSOCIATION_DB_DISEASE | <a href="#">spondyloarthropathies</a>                                     | RT |       | 2     | 0.4 | 9.2E-2  | 8.1E-1   |
| <input type="checkbox"/> | GENETIC_ASSOCIATION_DB_DISEASE | <a href="#">copd</a>                                                      | RT |       | 2     | 0.4 | 9.2E-2  | 8.1E-1   |
| <input type="checkbox"/> | GENETIC_ASSOCIATION_DB_DISEASE | <a href="#">dermatitis, atopic</a>                                        | RT |       | 2     | 0.4 | 9.2E-2  | 8.1E-1   |
| <input type="checkbox"/> | GENETIC_ASSOCIATION_DB_DISEASE | <a href="#">endometriosis</a>                                             | RT |       | 3     | 0.6 | 9.3E-2  | 8.0E-1   |
| <input type="checkbox"/> | GENETIC_ASSOCIATION_DB_DISEASE | <a href="#">arthritis</a>                                                 | RT |       | 3     | 0.6 | 9.6E-2  | 8.0E-1   |
| <input type="checkbox"/> | GENETIC_ASSOCIATION_DB_DISEASE | <a href="#">stroke, ischemic</a>                                          | RT |       | 3     | 0.6 | 9.9E-2  | 7.9E-1   |

### Multiple sclerosis genes

| OFFICIAL_GENE_SYMBOL | GENE NAME                                                                                                                                                                                         | Related Genes | Species      |
|----------------------|---------------------------------------------------------------------------------------------------------------------------------------------------------------------------------------------------|---------------|--------------|
| CTSS                 | <a href="#">cathepsin S</a>                                                                                                                                                                       | RG            | Homo sapiens |
| ICAM1                | <a href="#">intercellular adhesion molecule 1</a>                                                                                                                                                 | RG            | Homo sapiens |
| HLA-B, HLA-C         | <a href="#">major histocompatibility complex, class I, C; major histocompatibility complex, class I, B</a>                                                                                        | RG            | Homo sapiens |
| MX1                  | <a href="#">myxovirus (influenza virus) resistance 1, interferon-inducible protein p78 (mouse)</a>                                                                                                | RG            | Homo sapiens |
| PLP1                 | <a href="#">proteolipid protein 1</a>                                                                                                                                                             | RG            | Homo sapiens |
| HLA-DQA1             | <a href="#">similar to hCG2042724; similar to HLA class II histocompatibility antigen, DQ(1) alpha chain precursor (DC-4 alpha chain); major histocompatibility complex, class II, DQ alpha 1</a> | RG            | Homo sapiens |

Supplementary Figure S1: The disease classes of 66 significant differentially expressed genes were analyzed by DAVID functional annotation chart tool.

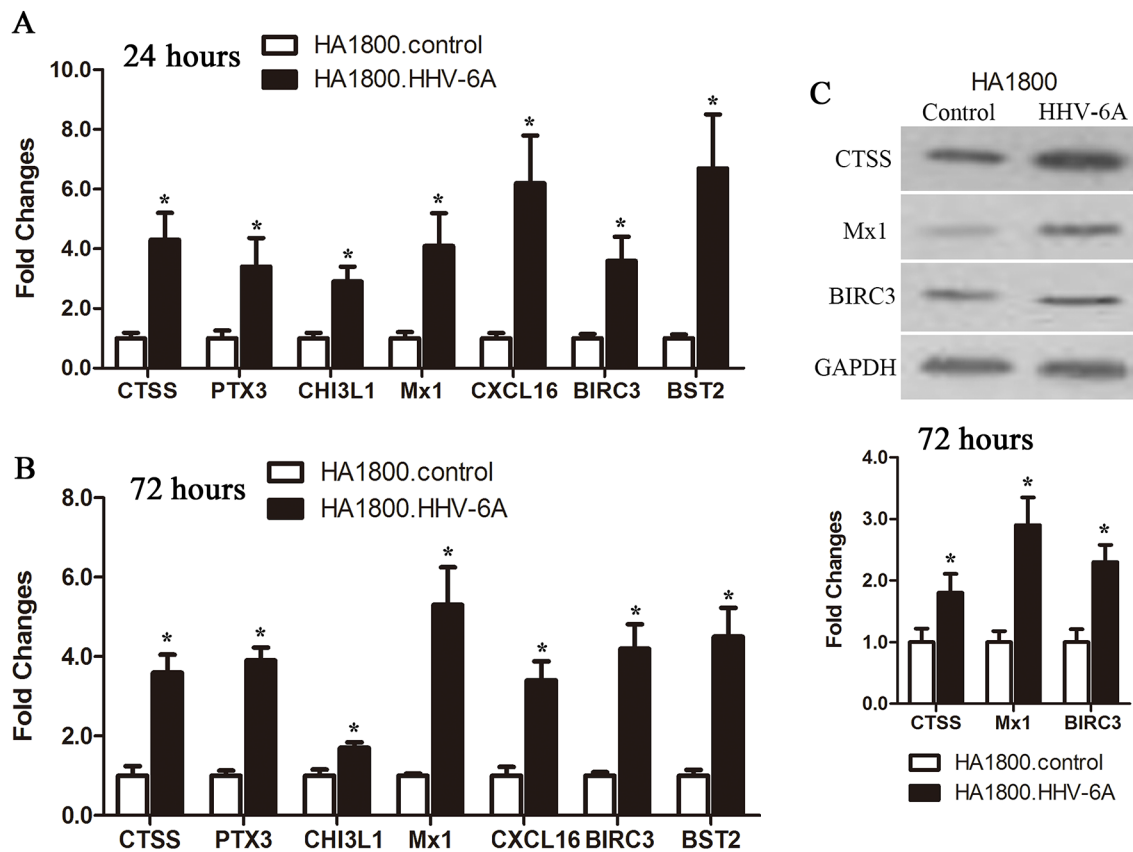

**Supplementary Figure S2: The verification of differentially expressed genes in HA1800-HHV6A GS cells.** **A.** Real-time PCR assay for upregulated genes at 24 hours in HA1800-HHV6A GS cells compared to control cells. All data represent mean  $\pm$  s.e.m. \* $P < 0.05$ . (n=4) **B.** Real-time PCR assay for upregulated genes at 72 hours in HA1800-HHV6A GS cells compared to control cells. All data represent mean  $\pm$  s.e.m. \* $P < 0.05$ . (n=4) **C.** Western blot assay for CTSS, Mx1, and BIRC3 genes at 72 hours in HA1800-HHV6A GS cells compared to control cells. All data represent mean  $\pm$  s.e.m. \* $P < 0.05$ . (n=3).

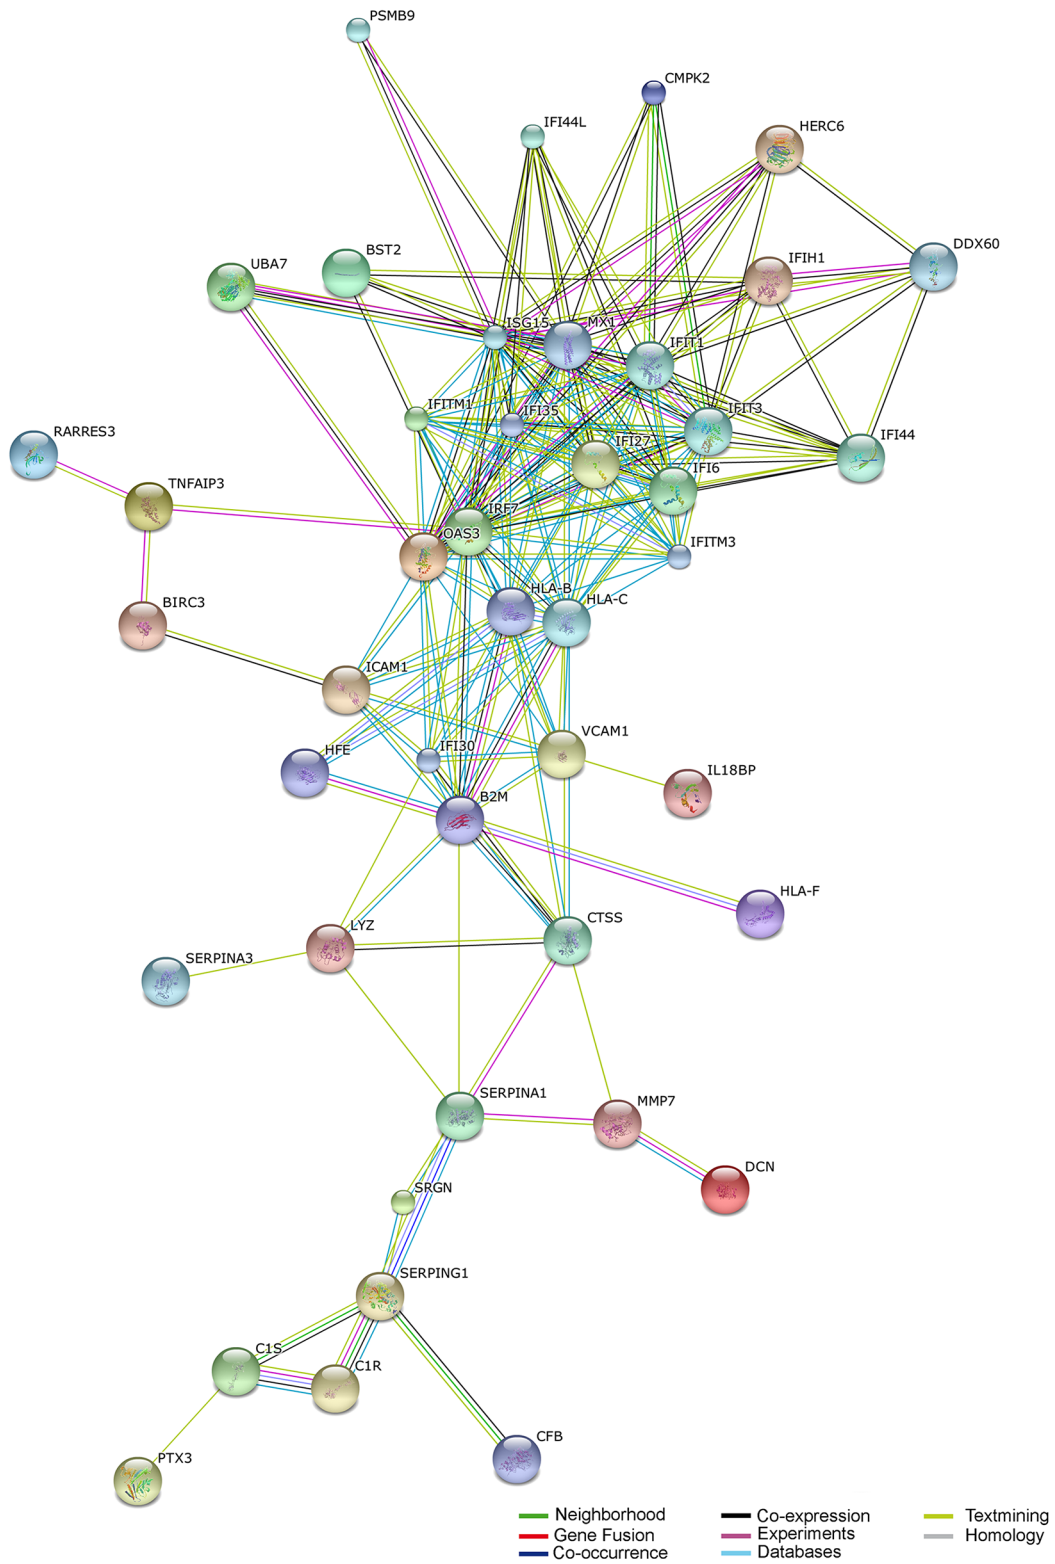

Supplementary Figure S3: The differentially expressed genes (249 genes of FDR < 0.1) exhibiting a positive correlation with viral infection by STRING (<http://string.embl.de/>).

**Supplementary Table S1: List of differentially expressed genes (16430 genes, and 249 genes of FDR < 0.1) between libraries.**

See Supplementary File 1

**Supplementary Table S2: List of 66 significant differentially expressed genes with FDR < 0.1 (HA1800-control expression > -1 and HA1800-HHV6-GS expression > 0) between libraries.**

See Supplementary File 2

**Supplementary Table S3: List of differentially expressed genes enriched GO terms for molecular functions.**

See Supplementary File 3

**Supplementary Table S4: List of differentially expressed genes enriched GO terms for cellular components.**

See Supplementary File 4

**Supplementary Table S5: List of differentially expressed genes enriched GO terms for biological processes.**

See Supplementary File 5

**Supplementary Table S6: List of differentially expressed genes enriched GO terms for pathway analysis.**

See Supplementary File 6

Supplementary Table S7: List of the primers for real-time PCR

| Gene symbols | Primers(5'-3')                                          |
|--------------|---------------------------------------------------------|
| CTSS         | F: TGACAACGGCTTTCCAGTACA<br>R: GGCAGCACGATATTTTGAGTCAT  |
| PTX3         | F: CATCTCCTTGCGATTCTGTTTTG<br>R: CCATTCCGAGTGCTCCTGA    |
| CHI3L1       | F: GTGAAGGCGTCTCAAACAGG<br>R: GAAGCGGTCAAGGGCATCT       |
| Mx1          | F: GTTTCCGAAGTGGACATCGCA<br>R: CTGCACAGGTTGTTCTCAGC     |
| CXCL16       | F: CCCGCCATCGGTTTCAGTTC<br>R: CCCCAGTAAGCATGTCCAC       |
| BIRC3        | F: TTTCCGTGGCTCTTATTCAAAC<br>R: GCACAGTGGTAGGAACTTCTCAT |
| BST2         | F: CACACTGTGATGGCCCTAATG<br>R: GTCCGCGATTCTCACGCTT      |
| GAPDH        | F: ACAACTTTGGTATCGTGGAAGG<br>R: GCCATCACGCCACAGTTTC     |
